# Supplementary material for: Combined Inositols, α-Lactalbumin, Gymnema Sylvestre and Zinc Improve the Lipid Metabolic Profile of Patients with Type 2 Diabetes Mellitus: A Randomized Clinical Trial
Source: MDPI journal article supplement (doi:10.3390/jcm12247650), 2023-12-13
Supplement: s1 [file s1]

| Parameter                                            | Supplement<br>(n=47) | Placebo<br>(n=28) | p value |
|------------------------------------------------------|----------------------|-------------------|---------|
| Smoke (%)                                            |                      |                   | 0.13    |
| Never                                                | 21.3                 | 35.7              |         |
| Past                                                 | 55.3                 | 57.1              |         |
| Actual                                               | 23.4                 | 7.1               |         |
| Familiarity for diabetes (%)                         | 72.3                 | 64.3              | 0.60    |
| Arterial hypertension (%)                            | 74.5                 | 78.6              | 0.78    |
| Ischemic heart disease (%)                           | 27.6                 | 35.7              | 0.61    |
| Coronary artery disease (%)                          | 38.3                 | 35.7              | 0.99    |
| Carotid stenosis (%)                                 | 23.4                 | 25.0              | 0.99    |
| Peripheral chronic obliterating arterial disease (%) | 6.4                  | 3.4               | 0.99    |
| Cerebral vascular disease (%)                        | 10.6                 | 3.4               | 0.40    |
| Thrombosis (%)                                       | 21.3                 | 25.0              | 0.78    |
| Chronic kidney disease (%)                           | 27.6                 | 32.1              | 0.79    |
| Diabetic retinopathy (%)                             | 12.8                 | 17.8              | 0.74    |
| Diabetic neuropathy (%)                              | 19.1                 | 14.3              | 0.76    |
| Neoplasia (%)                                        | 14.9                 | 14.3              | 0.99    |
| Chronic liver disease (%)                            | 8.5                  | 10.7              | 0.99    |
| Hepatosteatosi s (%)                                 | 27.6                 | 17.8              | 0.41    |
| Chronic pulmonary disease (%)                        | 4.2                  | 14.3              | 0.19    |
| Hypoglycemic drugs (%)                               |                      |                   |         |
| Basal insulin                                        | 27.6                 | 35.7              | 0.60    |
| Metformin                                            | 83.0                 | 75.0              | 0.55    |
| Pioglitazone                                         | 4.2                  | 0.0               | 0.53    |
| Repaglinide                                          | 2.1                  | 3.4               | 0.99    |
| Sulphonylureas                                       | 14.9                 | 14.3              | 0.99    |
| Acarbose                                             | 12.8                 | 14.3              | 0.99    |
| SGLT2 inhibitors                                     | 46.8                 | 57.1              | 0.48    |
| DPP-4 inhibitors                                     | 34.0                 | 21.4              | 0.30    |
| GLP-1 agonist receptors                              | 23.4                 | 35.7              | 0.29    |
| Cardiovascular therapies (%)                         |                      |                   |         |
| Anti-hypertensive                                    | 72.3                 | 78.6              | 0.60    |

|                     |      |      |      |
|---------------------|------|------|------|
| ACE-inhibitors      | 27.6 | 39.3 | 0.32 |
| Sartans             | 38.3 | 25.0 | 0.31 |
| B-blockers          | 53.2 | 53.6 | 0.99 |
| Calcium-antagonist  | 36.2 | 28.6 | 0.61 |
| Diuretics           | 31.9 | 32.1 | 0.99 |
| Apha1-blockers      | 8.5  | 21.4 | 0.16 |
| Statins             | 65.9 | 67.8 | 0.40 |
| Ezetimibe           | 8.5  | 10.7 | 0.40 |
| Omega               | 17.0 | 17.8 | 0.42 |
| Fibrates            | 4.3  | 3.4  | 0.42 |
| Antiplatelet agents | 51.1 | 42.8 | 0.63 |
| Anticoagulants      | 6.4  | 0.0  | 0.29 |

**Table S1. Additional baseline characteristics in the ITT population.** Other measured baseline characteristics in addition to those in Table 1. Data refers to all the enrolled patients, they are reported as n (%), unless otherwise specified. Statistical test used was the non parametric Mann-Whitney U test.
