# Supplementary material for: Combined Inositols, α-Lactalbumin, Gymnema Sylvestre and Zinc Improve the Lipid Metabolic Profile of Patients with Type 2 Diabetes Mellitus: A Randomized Clinical Trial
Source: MDPI journal article supplement (doi:10.3390/jcm12247650), 2023-12-13
Supplement: s1 [file s1]

| Parameter                    | Supplement<br>(n=22)  | Placebo<br>(n=14)  | p value |
|------------------------------|-----------------------|--------------------|---------|
| Body weight (kg)             | 78<br>[73.5 - 90]     | 87<br>[64.1 - 99]  | 0.35    |
| Fasting glycemia<br>(mmol/L) | 8.4<br>[6.9 - 10.2]   | 8.3<br>[7.2 - 8.7] | 0.49    |
| HbA1c (%)                    | 7.7<br>[7.6 - 8.1]    | 7.5<br>[7.4 - 7.9] | 0.19    |
| Total cholesterol (mg/dL)    | 143<br>[116 - 172]    | 188<br>[139 - 223] | 0.23    |
| HDL (mg/dL)                  | 40.5<br>[35.8 - 48.3] | 40<br>[34 - 47]    | 0.62    |
| LDL (mg/dL)                  | 71.5<br>[54.8 - 94.2] | 77<br>[73 - 155]   | 0.28    |
| Triglycerides (mg/dL)        | 151<br>[104 - 206.5]  | 183<br>[108 - 232] | 0.39    |

**Supplementary Table S2. Main baseline characteristics only in those patients with an unmodified antidiabetic therapy.** Values refer to those patients who did not modify the antidiabetic therapy and completed all the trial. They are expressed as median [IQR] and the statistical analysis was performed through Mann-Whitney U test.
